# Supplementary material for: Developing a machine learning model for predicting 30-day major adverse cardiac and cerebrovascular events in patients undergoing noncardiac surgery
Source: Research Square preprint supplement (doi:10.21203/rs.3.rs-4524391/v1), 2024-08-10

Supplementary Figure 1A. Recombination (1)

(a) AUROC predicting for MACCE

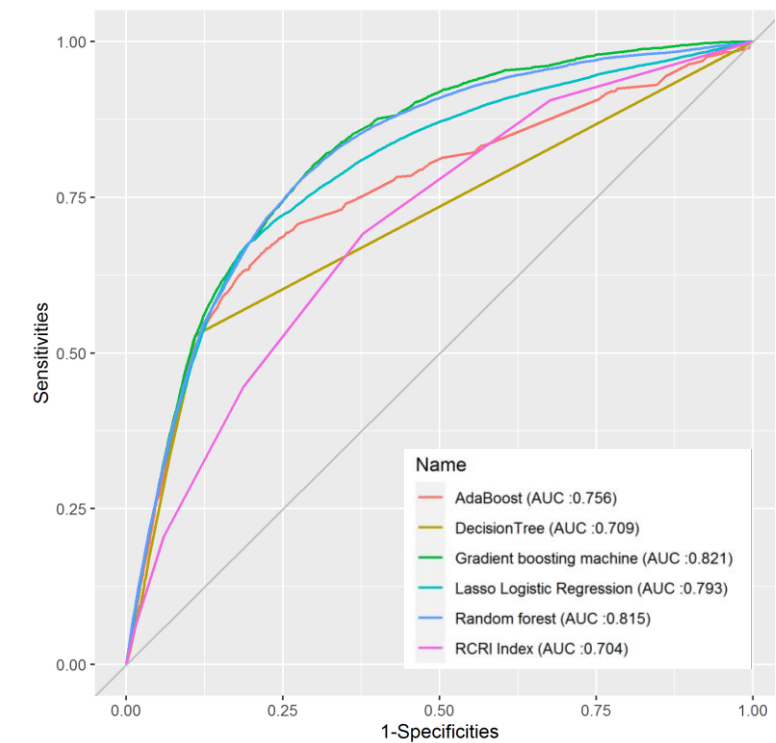

(b) AUPRC predicting for MACCE

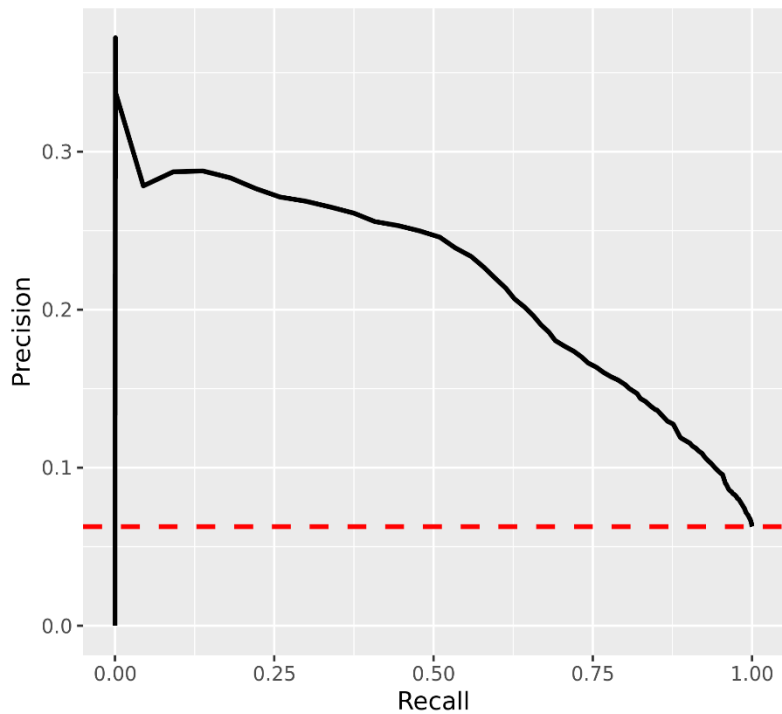

(c) Calibration plot for MACCE

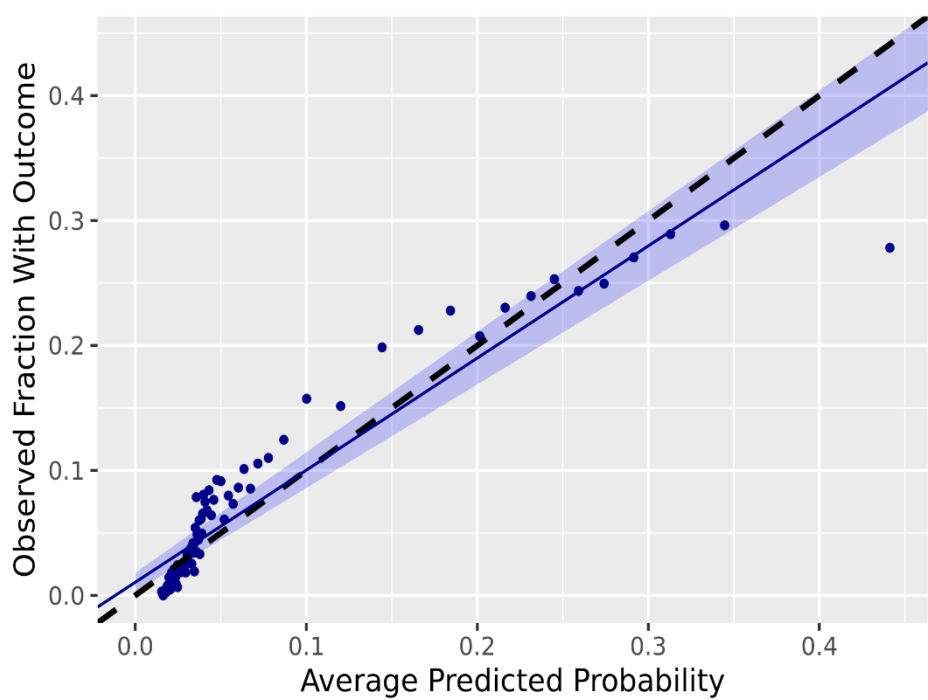

Supplementary Figure 1B. Recombination (2)

(a) AUROC predicting for MACCE

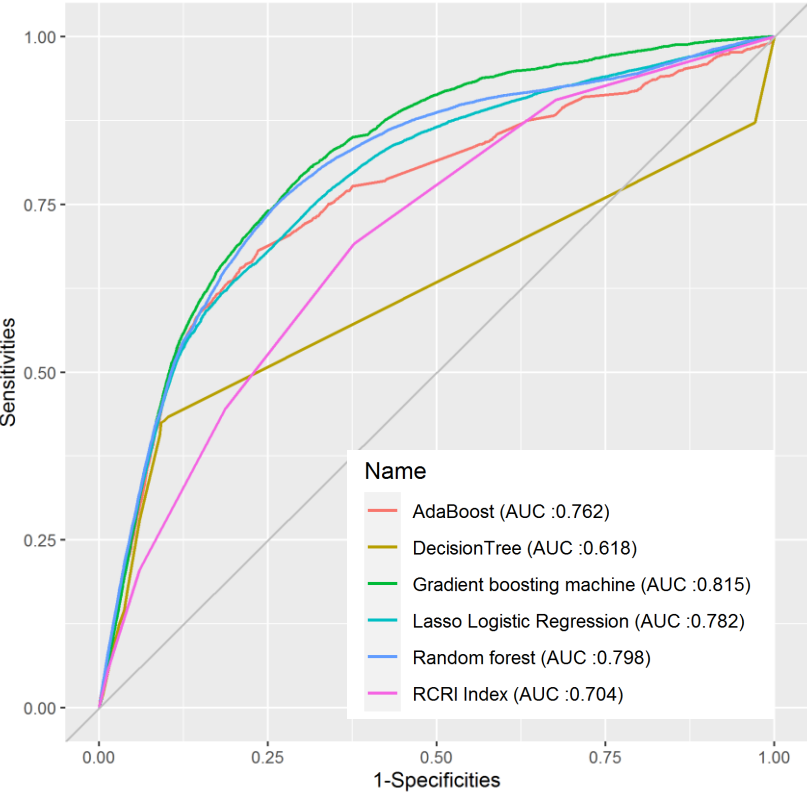

(b) AUPRC predicting for MACCE

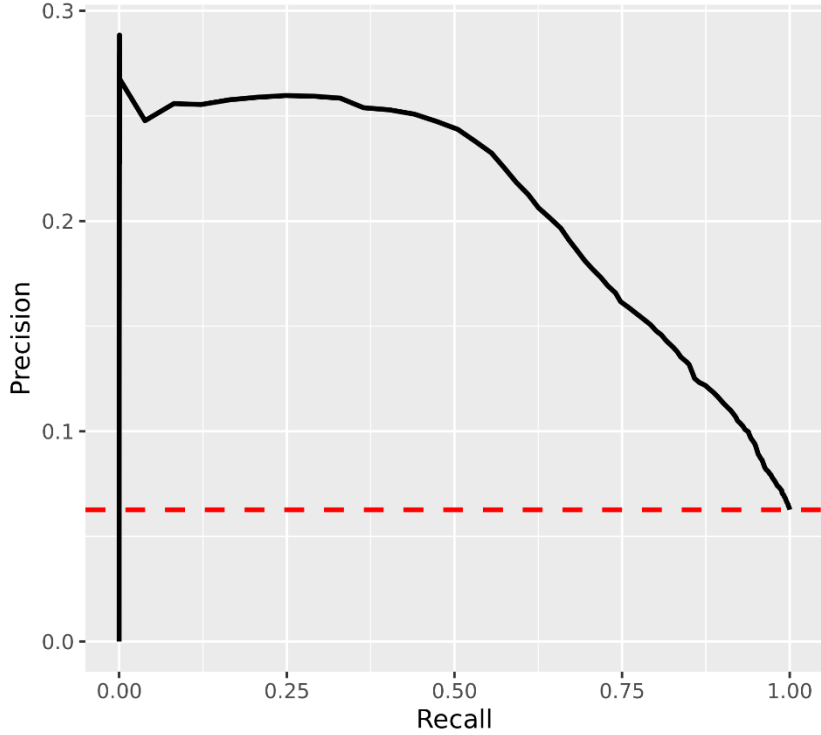

(c) Calibration plot for MACCE

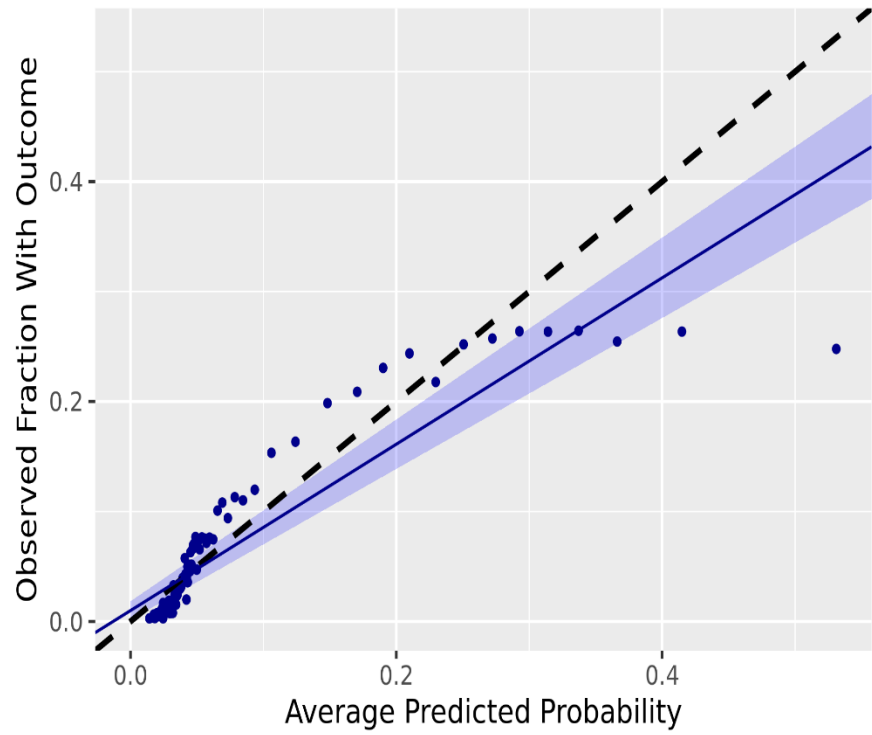

Supplementary Figure 1C. Recombination (3)

(a) AUROC predicting for MACCE

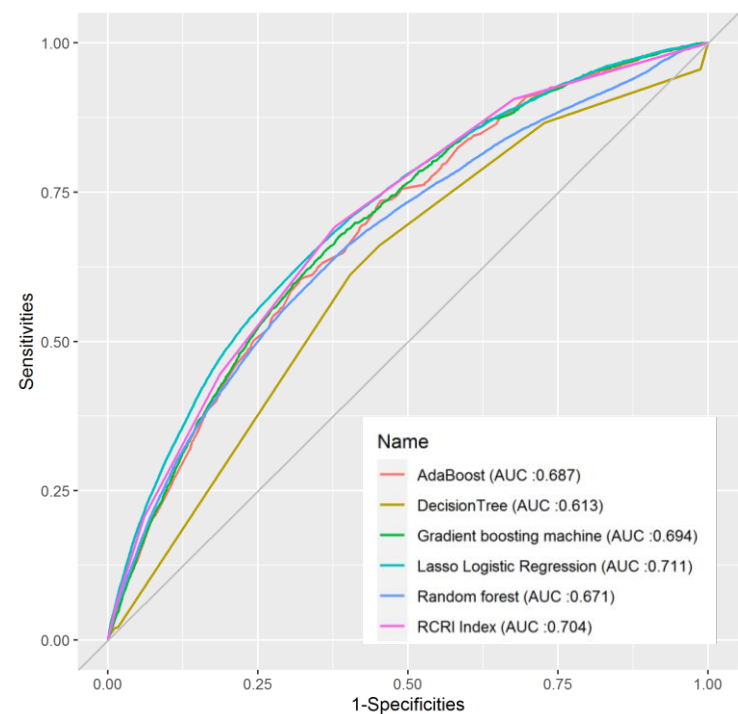

(b) AUPRC predicting for MACCE

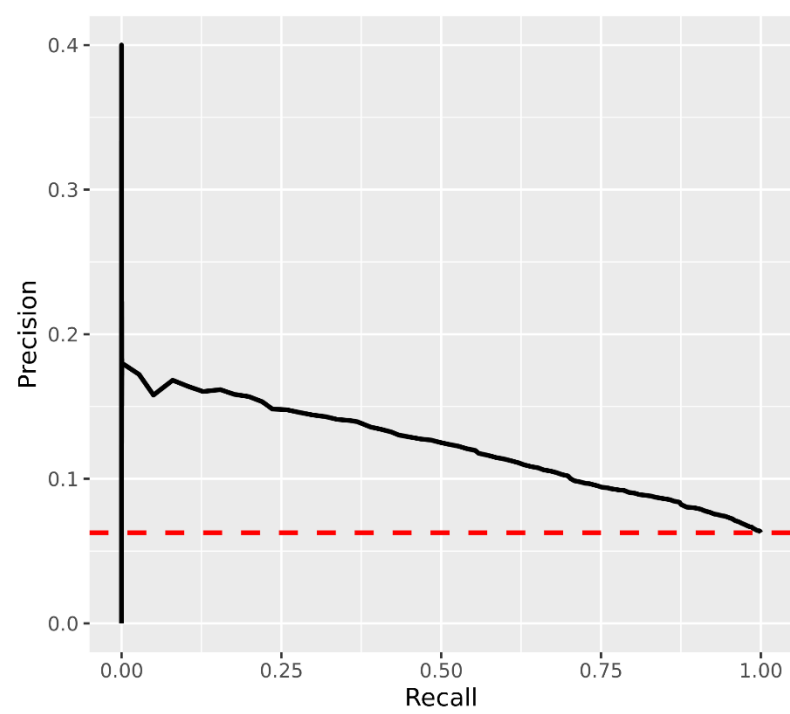

(c) Calibration plot for MACCE

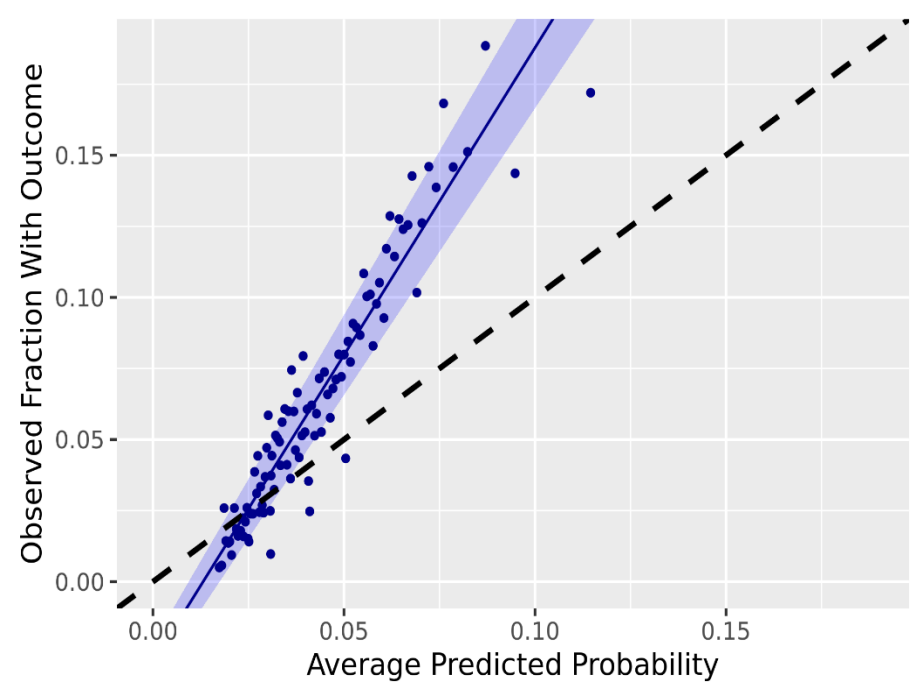

Supplement: Supplementary file 1 [file 03f5981199c43602d77e9453.pdf]
